# Supplementary material
Source: MDPI journal article supplement (https://www.mdpi.com/2073-4344/12/10/1142)
Supplement: s1 [file s1]

# Multivariable Analysis Reveals the Key Variables Related to Lignocellulosic Biomass Type and Pretreatment before Enzymolysis

Xiujun Wang <sup>1</sup>, Deliang Fan <sup>2</sup>, Yutong Han <sup>3</sup> and Jifei Xu <sup>1,\*</sup>

<sup>1</sup> Inner Mongolia Key Laboratory of Environmental Pollution Prevention and Waste Resource Recycle, School of Ecology and Environment, Inner Mongolia University, Hohhot 010021, China

<sup>2</sup> The First Harbour Engineering Company Limited of China Communications Construction Company Limited, Tianjin 300461, China

<sup>3</sup> Institute of Environmental Pollution Control and Treatment, Zhejiang University, Hangzhou 310058, China

\* Correspondence: jifeixu@imu.edu.cn

**Table S1.** The datasets during the different pretreatment processes and enzymolysis processes.

|    | Material | Method                 | Temperature (°C) | Solvent Contents (%) | ERSY (mg/g)       |
|----|----------|------------------------|------------------|----------------------|-------------------|
| 1  | Poplar   | Acid pretreatment      | 30               | 0.25                 | 169.35 ± 3.51 **  |
| 2  |          |                        | 30               | 1.00                 | 160.18 ± 6.57     |
| 3  |          |                        | 30               | 2.13                 | 161.58 ± 5.01     |
| 4  |          |                        | 105              | 0.25                 | 153.05 ± 4.82     |
| 5  |          |                        | 105              | 1.00                 | 146.89 ± 4.88 *   |
| 6  |          |                        | 105              | 2.13                 | 129.5 ± 3.09 **   |
| 7  |          |                        | 121              | 0.25                 | 142.51 ± 7.14     |
| 8  |          |                        | 121              | 1.00                 | 131.6 ± 2.63 **   |
| 9  |          |                        | 121              | 2.13                 | 119.64 ± 4.69 **  |
| 10 |          | Alkaline pretreatment  | 30               | 0.25                 | 174.48 ± 14.60    |
| 11 |          |                        | 30               | 0.50                 | 181.5 ± 7.84 **   |
| 12 |          |                        | 30               | 1.00                 | 192.68 ± 2.09 **  |
| 13 |          |                        | 105              | 0.25                 | 161.85 ± 19.15    |
| 14 |          |                        | 105              | 0.50                 | 183.9 ± 25.16     |
| 15 |          |                        | 105              | 1.00                 | 233.71 ± 10.40 ** |
| 16 |          |                        | 121              | 0.25                 | 192.62 ± 14.76 *  |
| 17 |          |                        | 121              | 0.50                 | 185.56 ± 28.35    |
| 18 |          |                        | 121              | 1.00                 | 191.68 ± 25.02    |
| 19 |          | Hot water pretreatment | 30               | 1:10                 | 170.27 ± 13.15    |
| 20 |          |                        | 30               | 1:20                 | 172.98 ± 0.16 **  |
| 21 |          |                        | 30               | 1:30                 | 173.71 ± 7.19 **  |
| 22 |          |                        | 105              | 1:10                 | 182.96 ± 4.31 **  |
| 23 |          |                        | 105              | 1:20                 | 158.23 ± 5.45     |
| 24 |          |                        | 105              | 1:30                 | 173.3 ± 7.84 **   |
| 25 |          |                        | 121              | 1:10                 | 182.55 ± 1.89 **  |
| 26 |          |                        | 121              | 1:20                 | 177.4 ± 6.93 **   |
| 27 |          |                        | 121              | 1:30                 | 193.65 ± 4.21 **  |
| 28 |          | Unpretreatment         | —                | —                    | 156.45 ± 1.3      |
| 29 | Salix    | Acid pretreatment      | 30               | 0.25                 | 194.56 ± 4.83     |
| 30 |          |                        | 30               | 1.00                 | 195.27 ± 5.40     |
| 31 |          |                        | 30               | 2.13                 | 157.28 ± 4.44 **  |

|    |                        |     |      |                   |
|----|------------------------|-----|------|-------------------|
| 32 |                        | 105 | 0.25 | 153.25 ± 4.54 **  |
| 33 |                        | 105 | 1.00 | 158.51 ± 8.65 *   |
| 34 |                        | 105 | 2.13 | 162.58 ± 10.58 *  |
| 35 |                        | 121 | 0.25 | 151.5 ± 7.13 **   |
| 36 |                        | 121 | 1.00 | 151.49 ± 10.17 ** |
| 37 |                        | 121 | 2.13 | 151.87 ± 5.40 **  |
| 38 |                        | 30  | 0.25 | 171.72 ± 2.38 *   |
| 39 |                        | 30  | 0.50 | 190.73 ± 5.71     |
| 40 |                        | 30  | 1.00 | 204.96 ± 8.74 *   |
| 41 |                        | 105 | 0.25 | 193.87 ± 9.60     |
| 42 | Alkaline pretreatment  | 105 | 0.50 | 212.86 ± 2.09 **  |
| 43 |                        | 105 | 1.00 | 241.24 ± 11.25 ** |
| 44 |                        | 121 | 0.25 | 179.65 ± 14.73 *  |
| 45 |                        | 121 | 0.50 | 182.89 ± 35.36    |
| 46 |                        | 121 | 1.00 | 175.41 ± 13.89    |
| 47 |                        | 30  | 1:10 | 260.36 ± 5.80 **  |
| 48 |                        | 30  | 1:20 | 254.34 ± 2.07 **  |
| 49 |                        | 30  | 1:30 | 260.77 ± 5.39 **  |
| 50 | Hot water pretreatment | 105 | 1:10 | 236.59 ± 17.72 ** |
| 51 |                        | 105 | 1:20 | 227.65 ± 12.40 ** |
| 52 |                        | 105 | 1:30 | 239.52 ± 18.69 ** |
| 53 |                        | 121 | 1:10 | 236 ± 17.80 **    |
| 54 |                        | 121 | 1:20 | 228.23 ± 16.85 *  |
| 55 |                        | 121 | 1:30 | 239.03 ± 15.69 ** |
| 56 | Unpretreatment         | —   |      | 184.87 ± 4.99     |
| 57 |                        | 30  | 0.25 | 327.60 ± 1.44     |
| 58 |                        | 30  | 1.00 | 321.85 ± 5.38     |
| 59 |                        | 30  | 2.13 | 334.92 ± 3.42     |
| 60 |                        | 105 | 0.25 | 387.62 ± 13.02 *  |
| 61 | Acid pretreatment      | 105 | 1.00 | 277.59 ± 4.16 **  |
| 62 |                        | 105 | 2.13 | 225.94 ± 10.81 ** |
| 63 |                        | 121 | 0.25 | 299.59 ± 19.97    |
| 64 |                        | 121 | 1.00 | 231.93 ± 6.12 **  |
| 65 |                        | 121 | 2.13 | 197.62 ± 6.81 **  |
| 66 |                        | 30  | 0.25 | 375.45 ± 1.47 *   |
| 67 |                        | 30  | 0.50 | 464.26 ± 35.40 ** |
| 68 |                        | 30  | 1.00 | 643.64 ± 3.22 **  |
| 69 | Corn cob               | 105 | 0.25 | 453.16 ± 27.47 ** |
| 70 | Alkaline pretreatment  | 105 | 0.50 | 549.78 ± 34.96 ** |
| 71 |                        | 105 | 1.00 | 635.82 ± 22.25 ** |
| 72 |                        | 121 | 0.25 | 464.41 ± 47.63 *  |
| 73 |                        | 121 | 0.50 | 546.20 ± 14.12 ** |
| 74 |                        | 121 | 1.00 | 610.04 ± 34.49 ** |
| 75 |                        | 30  | 1:10 | 319.83 ± 17.25    |
| 76 |                        | 30  | 1:20 | 309.33 ± 24.47    |
| 77 |                        | 30  | 1:30 | 318.99 ± 3.43     |
| 78 | Hot water pretreatment | 105 | 1:10 | 291.36 ± 33.37    |
| 79 |                        | 105 | 1:20 | 299.51 ± 12.82 *  |
| 80 |                        | 105 | 1:30 | 275.81 ± 9.11 **  |
| 81 |                        | 121 | 1:10 | 268.18 ± 41.60 *  |

|    |                |      |                  |
|----|----------------|------|------------------|
| 82 | 121            | 1:20 | 278.36 ± 3.08 ** |
| 83 | 121            | 1:30 | 304.06 ± 6.58 *  |
| 84 | Unpretreatment | —    | 342.23 ± 19.60   |

**Note:** Solvent contents referred to the acid content, alkaline content and the ratio of solid to liquid (S/L) for acid, alkaline and hot water pretreatment, respectively. The enzymolysis reducing sugar yield (ERSY) under each condition was tested compared with that of the unpretreated samples via Independent-Samples t-test at the 95% level; \*,  $P < 0.05$ ; \*\*,  $P < 0.01$ .
